# Supplementary material
Source: MDPI journal article supplement (https://www.mdpi.com/2073-4395/10/2/250)
Supplement: s1 [file s1]

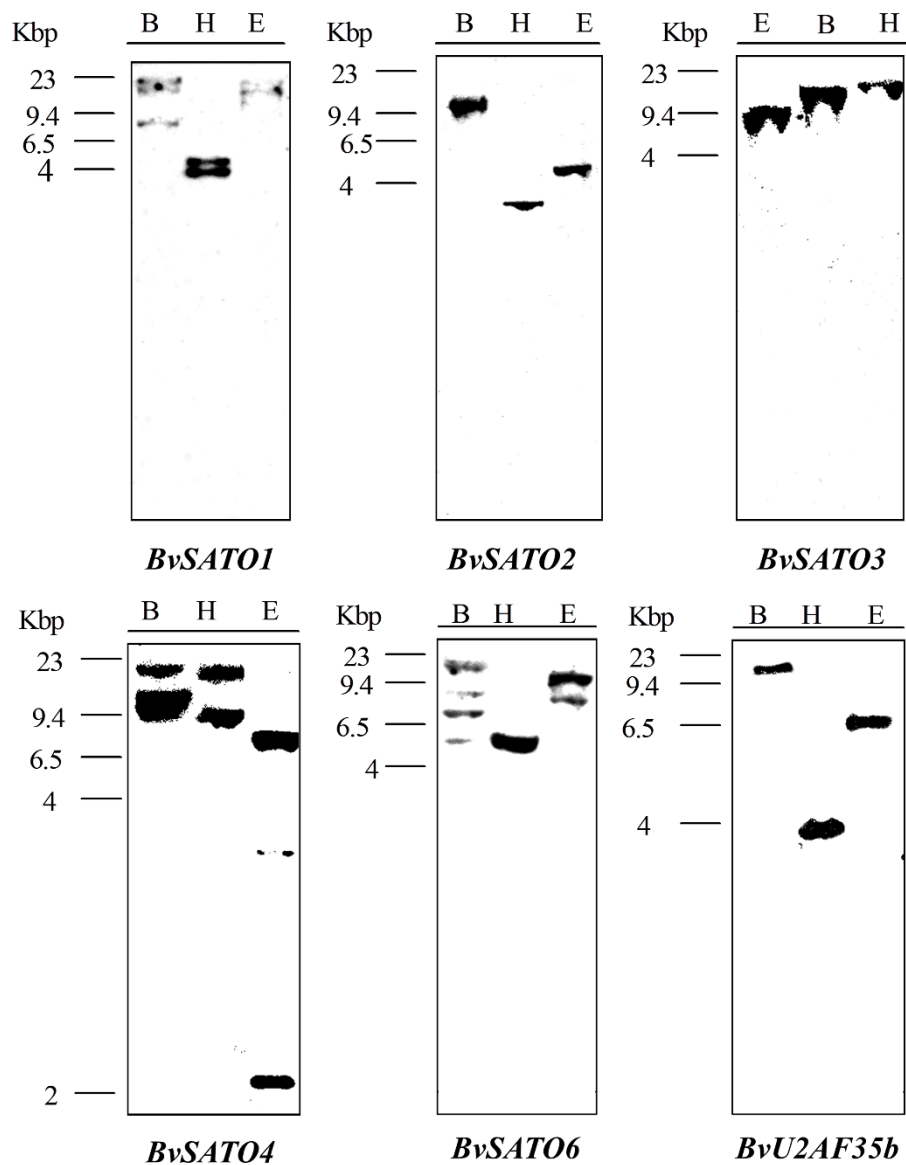

**Supplemental Figure S1.** Southern blot analysis of the sugar beet genes coding for RNA binding proteins giving salt tolerance to yeast. Genomic DNA was digested with *BamH* I (B), *Hind* III (H) or *EcoR* I, was separated on 0.8 % agarose gel, transferred onto a nylon membrane and hybridized with a radiolabeled probe of the respective gene.

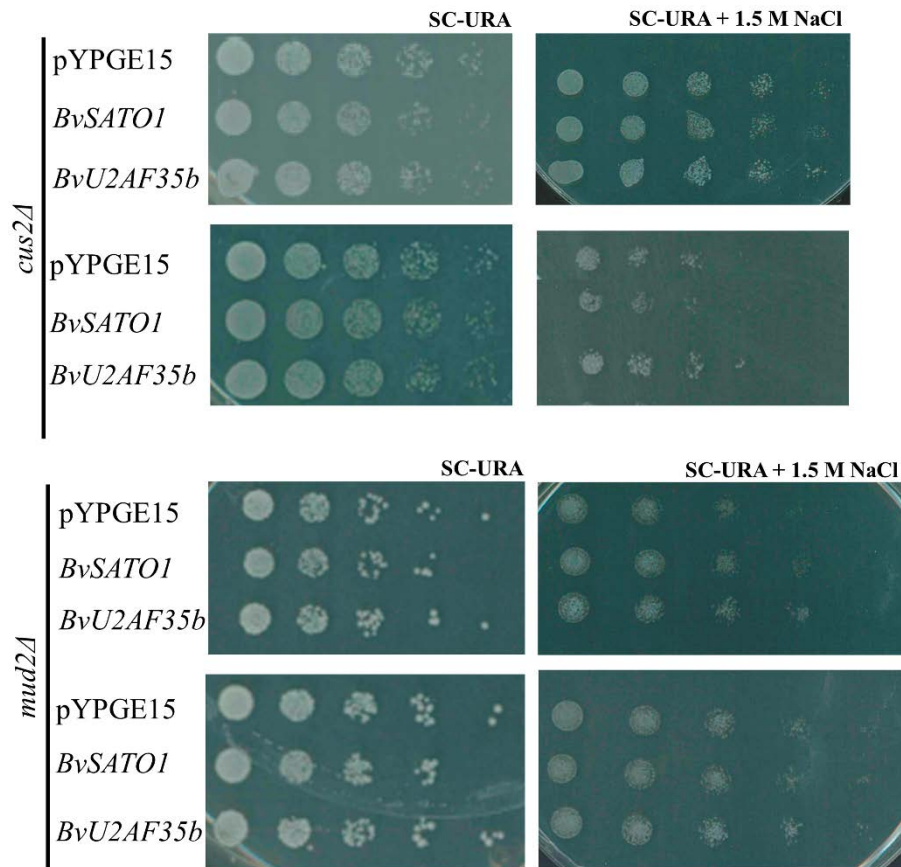

**Supplemental Figure S2.** Sodium tolerance phenotype of yeast mutants impaired in splicing when expressing the sugar beet RNA binding proteins BvSATO1 and BvU2AF35b. *cus2Δ* and *mud2Δ* mutants were transformed with either the empty vector (pYPGE15) or pYPGE15 containing the cDNA of *BvSATO1* or *BvU2AF35b*. Transformed cells were tested for tolerance to sodium. Spots are yeast serial dilutions as described in materials and methods. Images of cells grown in control media (SC) were taken after two days of growth. Images of cells grown in 1.5 M NaCl were taken seven days later.
